1 **Emotional information facilitates or disrupts memory integration through**  
2 **distinct hippocampal processes of reactivation and connectivity**

3

4 Yannan Zhu<sup>1,#,\*</sup>, Wei Liu<sup>1,2,#</sup>, Nils Kohn<sup>1</sup>, Guillén Fernández<sup>1</sup>

5

6 <sup>1</sup> *Donders Institute for Brain, Cognition and Behaviour, Radboud University Medical Center, Nijmegen 6525EN,*

7

*The Netherlands;*

8

<sup>2</sup> *School of Psychology, Central China Normal University (CCNU), Wuhan 430079, Hubei, China*

9

10

11

12

13

14 # Y. Zhu and W. Liu contributed equally to this work.

15 \* Correspondence should be addressed to

16 Yannan Zhu

17 E-mail: yan-nan.zhu@donders.ru.nl

18

19

20

21

22

23

24

25 **Abstract**

26 Emotion has a significant impact on how related experiences are organized into integrated memories.  
27 However, the neurobiological mechanisms of how emotion modulates memory integration for related  
28 information with different valences remain unclear. In this between-subject functional magnetic  
29 resonance imaging (fMRI) study, we investigated different emotional modulations of memory integration  
30 by manipulating the valence of stimuli used in an associative memory paradigm. Three groups of  
31 participants were tested: one group integrated emotional (i.e., negative) information with neutral  
32 information, one group integrated two emotional pieces of information, and one control group integrated  
33 two neutral pieces of information. Behaviorally, emotional information facilitated its integration with  
34 neutral information but interfered with the other emotional information. Neurally, the emotion-induced  
35 facilitation effect, occurring on memory integration of neutral and emotional information, was associated  
36 with increased trial-specific reactivation in the hippocampus during both encoding and retrieval. This  
37 facilitated integration was also supported by strengthened hippocampal connectivity with the amygdala,  
38 as well as a set of neocortical areas related to emotion regulation and the default mode network (DMN).  
39 In contrast, the emotion-induced interference effect, occurring on memory integration of two emotional  
40 pieces of information, was associated with impaired hippocampal trial-specific reactivation during  
41 retrieval that appeared to offset the facilitating effect of increased reactivation during encoding. Similar  
42 but relatively weak hippocampal connectivity was found underlying this interfered integration. Taken  
43 together, emotional information facilitates memory integration with neutral information, while disrupting  
44 the integration with other emotional information, through distinct dynamical processes of hippocampal  
45 trial-specific reactivation and connectivity.

46

47 **Keywords:** emotional modulation, memory integration, reactivation, hippocampus, facilitation,  
48 interference

49

## 50 **Introduction**

51 Our episodic memory is not a static repository of experiences, but a dynamically and constantly  
52 updating system enabling future use in an ever-changing environment (Ebbinghaus, 1885; Nader et al.,  
53 2000; Tulving, 1983). Memories of related experiences can be integrated into a highly adaptive network  
54 of overlapping representations (Eichenbaum, 2000; Shohamy and Wagner, 2008; Tulving, 1995). This  
55 memory integration mechanism makes interactions between existing knowledge and new experiences  
56 possible, contributing to a set of advanced cognitive functions, such as generalization (McClelland et al.,  
57 1995; Shepard, 1987), inference (Bunsey and Eichenbaum, 1996; Zeithamova, Schlichting, et al.,  
58 2012), and schema (Bartlett, 1932; Piaget, 2002). Through memory integration, emotional arousal not  
59 only strengthens memory for an emotional event (LaBar and Cabeza, 2006; LeDoux, 1994; Schacter,  
60 1999), but also has a broader impact on related, other events. Despite considerable efforts, a general  
61 consensus on the emotional modulation of related events has not been reached, as both facilitation and  
62 interference effects reported in divergent studies (Bravo-Rivera and Sotres-Bayon, 2020; Li et al., 2008;  
63 Mather and Sutherland, 2011; Wimmer and Shohamy, 2012; Zhu et al., 2022). In this study, we  
64 manipulated the emotional composition of to-be-integrated stimuli to elucidate the circumstances under  
65 which facilitation and interference effects occur, as well as their potentially distinct neural mechanisms.

66  
67 In our daily life, an emotional experience can modulate memories of specific events that share common  
68 contents with the emotional event even though they occur separately in time. Such episode-unique  
69 emotional learning can be tested with a trial-specific associative memory paradigm, accommodated by  
70 the memory integration mechanism (Bunsey and Eichenbaum, 1996; Preston et al., 2004). Given the  
71 view of interactive relationships among integrated memories (Bartlett, 1932; Schlichting and Frankland,  
72 2017; Schlichting and Preston, 2015), it is conceivable that the emotional modulation of memory  
73 integration not only depends on emotional information itself but also the valence of other related  
74 information in the integration. One prominent view, “facilitation theory”, has proposed that emotion

75 facilitates memory integration (Holmes et al., 2022; Shohamy and Daw, 2015). Recent studies have  
76 shown that an emotionally salient experience enhances memory for related neutral events, indicating a  
77 tighter memory integration with strengthened associations among these pieces of information (Wang  
78 and Kahnt, 2021; Wimmer and Shohamy, 2012; Wong et al., 2019; Zhu et al., 2022). However, an  
79 “interference theory” suggests that emotion disrupts memory integration (Bravo-Rivera and Sotres-  
80 Bayon, 2020; Mather, 2007). Studies supporting this view provide evidence of a mutual inhibitory effect,  
81 where equally prioritized emotional memories compete with each other and are overall suppressed  
82 (Mather and Sutherland, 2011; Morelli and Burton, 2009). Both facilitation and interference theories  
83 have gained supports from experimental evidence. However, clear evidence of when emotional  
84 information facilitates and when it disrupts memory integration is still needed.

85

86 Memory integration is thought to firstly form during encoding, and subsequently update during retrieval  
87 (de Sousa et al., 2021; Holmes et al., 2022). Human neuroimaging studies provide compelling evidence  
88 of an integrative encoding mechanism, also known as online integration (Kuhl et al., 2010; Shohamy  
89 and Wagner, 2008; van Kesteren et al., 2016). It proposes that the neural pattern of initial memory can  
90 be reactivated during the encoding of a new event with their overlapping representations as a bridge.  
91 Our memories become malleable to modification when reactivated, and thus can be integrated into a  
92 linked mnemonic network (Przybylski and Sara, 1997; Schwabe et al., 2014). Besides the encoding  
93 phase, a large body of evidence shows that memory retrieval also triggers the reactivation of neural  
94 ensembles engaged during encoding of the event (Liu et al., 2020; Nyberg et al., 2000; Tayler et al.,  
95 2013; Tulving and Thomson, 1973). The interactive influence between reactivation of integrated  
96 memories during retrieval could modify their initially formed integration (Bauml and Samenieh, 2010;  
97 Carneiro et al., 2021; Roediger and Abel, 2022). However, there is a gap in research on the various  
98 emotional modulations of memory integration, especially regarding how this process evolves from  
99 encoding to retrieval.

100

101 The hippocampus has been well recognized to play a critical role in integrating discrete experiences  
102 into a cohesive memory network through pattern completion (Eichenbaum, 2000; McClelland et al.,  
103 1995; Treves and Rolls, 1994), and might lie at the heart of differential emotional memory integration  
104 effects. Reactivation of hippocampal representations during the encoding of new events and retrieval  
105 supports the flexible integration of related experiences (Biderman et al., 2020; Kuhl et al., 2010; Tarder-  
106 Stoll et al., 2021; Wimmer and Buchel, 2021). Besides reactivation, hippocampal coordinated  
107 interactions with neocortical or subcortical structures, especially emotion-related regions (e.g., the  
108 amygdala), are also thought to be involved in emotional memory integration (Lima Portugal et al., 2020;  
109 Remondes and Wilson, 2013; Richter-Levin and Akirav, 2000; Sutherland and McNaughton, 2000).  
110 However, it remains unclear how hippocampal reactivation and connectivity contribute to different  
111 emotional modulations of memory integration.

112

113 Here, we examined the emotion-related facilitation and interference effects for memory integration. We  
114 conducted a between-subject fMRI experiment with an associative memory paradigm to probe memory  
115 integration, in which participants learned ABC triplets with two location-item associations (i.e., AB and  
116 AC) sharing one location cue (i.e., A) (**Fig. 1A**). To investigate memory integration between emotional  
117 (i.e., negative) information and related information with different valences (i.e., neutral or negative)  
118 across participants, we formed three groups: one integrating neutral and emotional associations (i.e.,  
119 Neutral-Emotional group), one integrating two emotional associations (i.e., Emotional-Emotional group),  
120 and one control group integrating two neutral associations (i.e., Neutral-Neutral group). First, we  
121 investigated how emotional information modulates integrated memory performance across the three  
122 groups. Then, we conducted pattern similarity and connectivity analyses to further investigate how  
123 hippocampal reactivation and connectivity during the encoding and retrieval phases may account for  
124 the potentially different emotional modulations.

125

## 126 **Materials and methods**

### 127 **Participants**

128 A total of 76 young, healthy, native Dutch-speaking participants were recruited from the Radboud  
129 University Subject Pool (48 females; aged 18-33 years; mean age  $\pm$  s.d.,  $23.4 \pm 3.20$  years). Data from  
130 six participants were excluded from the following analyses due to failure to complete all tasks ( $n = 5$ ), or  
131 failure to understand or follow the task instructions ( $n = 1$ ). Participants were randomly assigned into  
132 one of the three groups, one group in which participants encountered two neutral items associated with  
133 one location for each triplet (Neutral-Neutral group referred to as “NN group” in the text;  $n = 25$ , 14  
134 females), one group in which participants encountered a location with a neutral item followed by an  
135 emotional item for each triplet (Neutral-Emotional group referred to as “NE group”;  $n = 21$ , 16 females),  
136 and the third group in which participants encountered two emotional items associated with each  
137 location (Emotional-Emotional group referred to as “EE group”;  $n = 24$ , 16 females). Two additional  
138 participants in the EE group were excluded from analyses of the category recall test due to falling  
139 asleep during scanning. The sample size was determined based on prior studies using associative  
140 memory paradigm (Schlichting et al., 2021; Schlichting et al., 2015). The experiment was approved by  
141 and conducted following the requirements of the local ethics committee (CMO2014/288, Commissie  
142 Mensgebonden Onderzoek, Region Arnhem-Nijmegen, The Netherlands), and the declaration of  
143 Helsinki, including the requirement of written informed consent from each participant before the  
144 beginning of the experiment.

145

### 146 **Materials**

147 Stimuli included 48 locations on two cartoon maps and 192 pictures. Specific locations (e.g., hospital,  
148 restaurant, and square), as memory cues, were captured from two cartoon maps with 24 locations in  
149 each map (Liu et al., 2020, 2021). The distinctive pictures (i.e., 96 negative and 96 neutral) were  
150 selected from the International Affective Picture System (Lang et al., 1997). Each picture belongs to

151 one of the three categories: animal (e.g., barking dog), human (e.g., reading girl), and scene (e.g.,  
152 modern city). Category information was used for the category recall test under scanning to enable  
153 simple button press responses. Each location cue (i.e., A) was paired with two items (i.e., B and C) to  
154 create 48 ABC triplets. In the NN group, both items B and C were neutral pictures. In the NE group,  
155 items B were neutral and items C were negative pictures. In the EE group, both items B and C were  
156 negative pictures. Items B and C were selected from different categories and counterbalanced for  
157 individual participants in each group.

158

### 159 **Experimental procedures**

160 Participants were instructed to learn 48 location-item pairs (i.e., AB) as first associations, and then the  
161 same 48 locations paired with new items (i.e., AC) as second associations during a blocked design  
162 associative encoding phase. Thereafter, during the retrieval phase, participants completed a category  
163 recall test. The associative encoding and category recall test were performed during a 30-min fMRI  
164 scanning session. After an approximately 20-min delay, a self-paced cued-recall test was performed  
165 outside the scanner (**Fig. 1A**).

166

167 **Associative encoding.** This phase included four 4 min and 30 s runs. In each run, participants learned  
168 12 first associations, and then 12 corresponding second associations twice (i.e., AB, AC, AB, AC). They  
169 were instructed to vividly imagine each location in relation to its paired item to aid their memory. During  
170 each trial, the entire map was initially presented for 0.5 s, followed by a yellow frame appearing on the  
171 map to highlight a specific location cue for 1 s, and then the location cue and its paired item were  
172 presented side-by-side together for 2.5 s. Trials were interleaved by a fixation cross with an inter-trial  
173 interval jittered from 0.5 to 1.5 s (i.e., 1 s on average with 0.25 s steps).

174

175 **Category recall.** Subsequently, participants performed an immediate category recall test for the 48 first  
176 associations. This task included two 5 min and 6 s runs with 24 trials in each run. During each trial, the  
177 entire map with a highlighted location was presented for 3 s and followed by the location cue on its own  
178 for 4 s. Participants were instructed to recall the item paired with this location cue in the FIRST  
179 association (i.e., AB) as vividly as possible, and then indicate the category of their imagined item by  
180 pressing an appropriate button from the four options (i.e., Animal, Human, Scene, and Don't know)  
181 within 3 s. Trials were also interleaved by a fixation cross with an inter-trial interval jittered from 1.3 to  
182 1.9 s (i.e., 1.6 s on average).

183

184 **Cued-recall.** After completing the category recall test during the scanning session, participants  
185 performed a self-paced cued-recall test with an average duration of 15 min and 24 s (i.e., range from  
186 ~8 to ~34 min), for both first and second associations. Each of the 48 location cues was presented in a  
187 random order across participants. Participants were instructed to recall paired item in the first and  
188 second associations separately, by typing a brief description of this item on a standard keyboard within  
189 60s.

190

### 191 **Behavioral data analysis**

192 Participants' demographic data and memory performance were analyzed using Statistical Product and  
193 Service Solutions (SPSS, version 23.0, IBM). In the cued-recall test, participants' description answers  
194 were evaluated by two native Dutch experimenters independently. If the answer provided enough  
195 detailed information (e.g., a little black cat) for the experimenter to identify the correct item in the  
196 association, as distinct from other items used in the experiment, it was labeled as correct. If the answer  
197 was detailed enough but allowed the experimenter to identify the item in the other association of this  
198 triplet (i.e., an answer of item in the corresponding second association when the instruction was to  
199 recall the first association, and vice versa), it was labeled as related. Otherwise, if the answer was



200 entirely wrong (i.e., an answer of item in neither the first nor second association of this triplet) or not  
201 specific enough (e.g., a small animal), then it was labeled as incorrect. We used Cohen's kappa  
202 coefficient ( $\kappa$ ) to measure inter-rater reliability (Altman, 1990), and found almost perfect reliability  
203 between the two experimenters' evaluations ( $\kappa = 0.96$ ,  $p < 0.001$ ). For the answers in which the  
204 experimenters disagreed (3.28 trials on average with a total of 96 trials per participant), they were  
205 resolved by discussion between the two experimenters or by extra evaluation from a third experimenter.  
206 The cued-recall memory performance was calculated based on the final determination. Effect sizes  
207 reported for ANOVAs are partial eta squared, referred to in the text as  $\eta^2$ . 95% confidence intervals (CI)  
208 for post-hoc comparisons were also reported. Effect sizes reported for paired t-tests are Cohen's  $d$ .

209

## 210 **Imaging acquisition**

211 MRI data were acquired using a 3.0 T Siemens Skyra (Siemens Medical, Erlangen, Germany) with a  
212 32-channel head coil system at the Donders Institute, Centre for Cognitive Neuroimaging in Nijmegen,  
213 the Netherlands. Functional images were collected using a multi-band echo-planar imaging (mb-EPI)  
214 sequence (slices, 66; multi-slice mode, interleaved; slice thickness, 2 mm; TR, 1000 ms; TE, 35.2 ms;  
215 flip angle, 60°; multiband accelerate factor, 6; voxel size, 2 × 2 × 2 mm; FOV, 213 × 213 mm). To  
216 correct for spatial distortions, fieldmap images were acquired (slices, 66; multi-slice mode, interleaved;  
217 slice thickness, 2 mm; TR, 500 ms; TE1, 2.80 ms; TE2, 5.26 ms; flip angle, 60°; voxel size, 2 × 2 × 2  
218 mm; FOV, 213 × 213 mm). Structural images were acquired using a three-dimensional sagittal T1-  
219 weighted magnetization-prepared rapid gradient echo (MPRAGE) sequence (slices, 192; slice  
220 thickness, 1 mm; TR, 2300 ms; TE, 3.03 ms; flip angle, 8°; voxel size, 1 × 1 × 1 mm; FOV, 256 × 256  
221 mm).

222

## 223 **Imaging preprocessing**

224 Brain imaging data were preprocessed using fMRIPrep (version 20.0.6) (Esteban et al., 2019) and  
225 FEAT (fMRI Expert Analysis Tool, version 6.0) (Jenkinson et al., 2012). Brain images were corrected  
226 for field inhomogeneity using the fieldmaps, and realigned for head-motion correction using MCFLIRT  
227 (Jenkinson et al., 2002). No additional slice-timing correction was performed. Each participant's  
228 functional images were then co-registered to their T1-weighted anatomical image using FLIRT with the  
229 boundary-based registration (BBR) cost-function (Greve and Fischl, 2009), and spatially normalized  
230 into a standard MNI space (FSL's MNI152 2 mm template). Images used for the univariate general  
231 linear model (GLM) and psycho-physiological interaction (PPI) analyses were smoothed with a 6-mm  
232 FWHM Gaussian kernel, whereas no spatial smoothing was performed on images used for the pattern  
233 similarity analysis to retain voxel-wise information. We performed the automatic removal of motion  
234 artifacts using independent component analysis (ICA-AROMA) (Pruim et al., 2015) on brain data to  
235 further remove spurious noise related to motion, using non-aggressive denoising. In addition, we  
236 discarded the first 10 volumes of functional images for signal equilibrium and applied high-pass  
237 temporal filtering (Gaussian-weighted least-squares straight line fitting with  $\sigma = 90.0$  s) before the  
238 subsequent analyses.

239

## 240 **Univariate general linear model (GLM) analysis and regions of interest (ROIs) definition**

241 To investigate the brain activity in response to subsequently remembered relative to forgotten items  
242 (i.e., subsequent memory effect, SME), we conducted voxel-wise GLMs for the encoding phase. FILM  
243 prewhitening was also applied to remove temporal autocorrelation (Woolrich et al., 2001). Trials (i.e.,  
244 both first and second associations) were modeled with 4 s from the onset of each stimulus (i.e., the  
245 entire map) and convolved with FEAT's hemodynamic response function (HRF). Three regressors of  
246 interest were included in each GLM based on individual cued-recall memory performance: 1) correct  
247 responses; 2) related responses; 3) incorrect, missing, or 'don't know' responses. To account for

248 potential artifacts of movement, the motion parameters produced during realignment and stick functions  
249 (i.e., frame displacement that exceeded a threshold of 2 mm) were also included as additional  
250 regressors in each GLM. Contrast images of remembered (i.e., correct responses) relative to forgotten  
251 (i.e., incorrect, missing, or 'don't know' responses) condition were generated at the individual-subject  
252 level. Related responses were not included in this contrast, as they were very few and might be caused  
253 by wrong order (i.e., first or second) memory. These resultant images were then entered into the group-  
254 level analysis, and corrected for multiple comparisons using cluster-mass thresholding within FEAT  
255 (voxel-wise  $z > 3.1$ , cluster-level  $p < 0.05$  FWER corrected; *Fig. S1A*).

256

257 To investigate the brain activity in response to correctly recalled relative to forgotten items (i.e.,  
258 successful retrieval effect), we conducted voxel-wise GLMs for the retrieval phase (i.e., the category  
259 recall test for first associations only). Trials were modeled with 3 s from the onset of each stimulus (i.e.,  
260 the entire map with highlighted location) and convolved with FEAT's HRF. The three regressors of  
261 interest (i.e., correct responses, related responses, and incorrect, missing, or 'don't know' responses)  
262 based on individual category-recall performance were included in each GLM. The following 4-s  
263 presentations of location cues and 3-s presentations of category detection were also included as two  
264 regressors of no interest. Contrast images (i.e., remembered vs. forgotten) were generated at the  
265 individual-subject level and then entered into the group-level analysis (*Fig. S1B*). All other settings (i.e.,  
266 motion regressors and thresholding) were the same as the above GLM analysis of the encoding phase.

267

268 We functionally identified a bilateral hippocampal ROI by the univariate activation contrast of  
269 remembered relative to forgotten condition during encoding. The hippocampal ROI defined by the  
270 encoding contrast map was contained in the anatomical automatic labeling (AAL) template of  
271 "hippocampus" constrained by the retrieval contrast map (i.e., remembered vs. forgotten). Thus, our  
272 hippocampal ROI was engaged (i.e., activate and reactivate) in both encoding and retrieval, showing a  
273 reliable memory effect. This hippocampal ROI was used in the following pattern similarity and PPI

274 analyses (**Fig. 2B, 3A**, and *Fig. S6A*). The posterior medial cortex (PMC), as a control region in pattern  
275 similarity analyses, was defined by a probabilistic atlas of resting-state default mode network from FIND  
276 lab at Stanford University ([https://findlab.stanford.edu/functional\\_ROIs.html](https://findlab.stanford.edu/functional_ROIs.html)) (Chen et al., 2016; Shirer  
277 et al., 2012) (*Fig. S5A*). We also anatomically defined a left amygdala ROI based on the AAL from the  
278 WFU PickAtlas toolbox (<http://fmri.wfubmc.edu/software/PickAtlas>). The amygdala ROI was used in the  
279 PPI analysis (**Fig. 3B** and *Fig. S6B*).

### 280

### 281 **Reactivation: multivariate pattern similarity analysis (MVPA)**

282 To assess emotion-modulated effects on hippocampal reactivation during encoding and retrieval  
283 phases, we conducted an ROI-based trial-by-trial MVPA (Kriegeskorte et al., 2008; Xue et al., 2010). A  
284 separate regressor was generated for each trial with 2.5 s from the onset of each location-picture pair  
285 during the encoding phase (i.e., collapsing across two repetitions), and for each trial with 3 s from the  
286 onset of each entire map with highlighted location during the category retrieval phase, convolved with  
287 FEAT's HRF. It resulted in four GLMs for the encoding phase and two GLMs for the retrieval phase,  
288 each with 24 regressors. Then, the *t*-values of resulting spatial activation pattern for each trial in the  
289 hippocampal ROI were extracted into a vector and z-scored. The similarity between different vectors  
290 was computed using Pearson's correlation and Fisher-transformed before statistical analyses.

### 291

### 292 **Functional connectivity: psycho-physiological interaction (PPI) analysis**

293 To assess emotion-modulated effects on hippocampal functional connectivity during encoding and  
294 retrieval phases, we conducted a generalized form of task-dependent PPI (gPPI) analysis (Friston et al.,  
295 1997; Harrison et al., 2017). Contrast images corresponding to the whole-brain PPI effect (i.e., second  
296 vs. first associations during encoding, or triplets with both associations remembered vs. no association  
297 remembered during category retrieval) at the individual-subject level were then submitted to a one-way  
298 ANOVA for the group-level analysis. Significant clusters were determined using the same criterion as

299 the above univariate GLMs. Mean  $t$ -values extracted from the resultant significant clusters were  
300 submitted into separate post-hoc comparison tests, and visualized in bar graphs to show specific group  
301 differences. In line with our prior hypothesis, we also extracted mean  $t$ -values of hippocampal  
302 connectivity data from the amygdala ROI and then submitted them into the one-way ANOVA.

303

#### 304 **Data and code availability**

305 The research data and scripts of this study were uploaded to the Donders repository  
306 (<https://data.donders.ru.nl/>) and are publicly available upon publication. The project was named  
307 “Emotional Modulation of the Interaction Between Related Memories with Functional MRI” in the  
308 repository (<https://doi.org/10.34973/esn0-yf75>).

309

#### 310 **Results**

311 **Behavioral performance: Emotional information facilitates integrated memory with related**  
312 **neutral information, but interferes with other emotional information.**

313 Based on the cued-recall memory performance, we calculated the integrated memory performance as  
314 the proportion of triplets with both associations remembered correctly. We also calculated the non-  
315 integrated memory performance for associations that failed to integrate with each other, as the  
316 proportion of triplets with only one (i.e., either first or second) association remembered correctly. The  
317 latter was further separated into the proportions of triplets with only the first association remembered  
318 correctly, and triplets with only the second association remembered correctly, to measure only first and  
319 only second associative memory performances.

320

321 Firstly, to investigate different emotion-modulated effects on integrated memory compared to non-  
322 integrated memory across the three groups, we conducted a 2 (Memory: integrated vs. non-integrated)

323 by 3 (Group: Neutral-Neutral vs. Neutral-Emotional vs. Emotional-Emotional) repeated-measures  
324 ANCOVA with gender as a covariate of no interest, given that gender was not balanced across groups.  
325 This analysis revealed a significant main effect of Group ( $F_{(2,66)} = 5.74$ ,  $p = 0.005$ , partial  $\eta^2 = 0.15$ ) and  
326 a trend for Memory-by-Group interaction effect ( $F_{(2,66)} = 2.60$ ,  $p = 0.082$ , partial  $\eta^2 = 0.07$ ), but no main  
327 effect of Memory ( $F_{(1,66)} = 0.47$ ,  $p = 0.495$ , partial  $\eta^2 = 0.01$ ; **Fig. 1B**). Post-hoc comparisons revealed  
328 better integrated memory in the Neutral-Emotional (i.e., NE) group than Neutral-Neutral (i.e., NN;  $p =$   
329  $0.006$ , 95%CI = [0.047, 0.273]) and Emotional-Emotional (i.e., EE;  $p = 0.005$ , 95%CI = [0.052, 0.278])  
330 groups, but no significant difference in non-integrated memory across the three groups (all  $p > 0.290$ ).  
331 This result indicates that emotional information selectively facilitates its integrated memory with related  
332 neutral information in the NE group.

333

334 It is worth noting that this emotion-related facilitation effect for integrated memory was not found in the  
335 EE (vs. NN) group ( $p = 0.928$ ), although the EE group contained emotional information as well. Thus, to  
336 further investigate whether a different emotional modulation especially occurs in the EE group, we  
337 conducted a 2 (Memory: only first vs. only second) by 3 (group: NN vs. NE vs. EE) repeated-measures  
338 ANCOVA also with gender as a covariate of no interest. This analysis revealed a trending main effect of  
339 Memory ( $F_{(1,66)} = 3.18$ ,  $p = 0.079$ , partial  $\eta^2 = 0.05$ ) and a significant Memory-by-Group interaction effect  
340 ( $F_{(2,66)} = 5.46$ ,  $p = 0.006$ , partial  $\eta^2 = 0.14$ ), but no main effect of Group ( $F_{(2,66)} = 0.74$ ,  $p = 0.484$ , partial  
341  $\eta^2 = 0.02$ ; **Fig. 1C**). Post-hoc comparisons revealed better second associative memory in the EE group  
342 than NN ( $p = 0.011$ , 95%CI = [0.008, 0.061]) and NE ( $p = 0.005$ , 95%CI = [0.012, 0.067]) groups, but in  
343 contrast, worse first associative memory in the EE group than NN ( $p = 0.042$ , 95%CI = [-0.143, -0.003])  
344 and NE ( $p = 0.036$ , 95%CI = [-0.152, -0.005]) groups. A similar repeated-measures ANCOVA for  
345 category-recall memory performance also revealed the Memory-by-Group interaction effect ( $F_{(2,64)} =$   
346  $7.35$ ,  $p = 0.001$ , partial  $\eta^2 = 0.19$ ), with better non-target second memory ( $p = 0.005$ , 95%CI = [0.024,  
347 0.132]) but worse target first memory ( $p < 0.001$ , 95%CI = [-0.306, -0.098]) in the EE than NE group  
348 (see *Fig. S2 for details*). These results indicate that emotional information disrupts its integrated

349 memory with the other related emotional information, perhaps due to a competition between two  
350 overlapping emotional associations in the EE group.

351

352 These behavioral results collectively demonstrate that emotional stimuli can facilitate the integration of  
353 neutral and emotional information into episodic memory, while also disrupting the integration of two  
354 emotional pieces of information.

355

356 **Pattern similarity: The emotion-related facilitation and interference effects are separately**  
357 **associated with increased and impaired hippocampal reactivation during encoding and retrieval.**

358 Next, to investigate whether and how hippocampal reactivation during encoding and retrieval phases  
359 contributes to the observed emotion-related facilitation and interference effects, we conducted a trial-  
360 by-trial MVPA on the hippocampal ROI (**Fig. 2B**). The encoding reactivation characterizes neural  
361 reactivation of learning activity for first association cued by the overlapping location during the encoding  
362 of its corresponding second association. It was measured as encoding pair-specific relative to across-  
363 pair similarity to capture the trial-specific reactivation (or reinstatement) effect (**Fig. 2A**). The retrieval  
364 reactivation, including retrieval-first reactivation and retrieval-second reactivation, characterizes neural  
365 reactivation of encoding activity for first/second association cued by the location during the category  
366 retrieval. The retrieval-first/second reactivation was also measured as retrieval-first/retrieval-second  
367 pair-specific relative to retrieval across-pair similarity (**Fig. 2A**). Consistent with previous studies  
368 (Jonker et al., 2018; Wimmer and Shohamy, 2012; Zeithamova, Dominick, et al., 2012), we found that  
369 both encoding reactivation and retrieval reactivation (i.e., averaging retrieval-first and retrieval-second  
370 reactivation) were associated with greater integrated memory performance (*see Fig. S3 for statistical*  
371 *details*).

372

373 To investigate different emotion-modulated effects on hippocampal encoding reactivation across the  
374 three groups, we conducted a one-way ANOVA with Group (NN vs. NE vs. EE) as a between-subject  
375 factor (**Fig. 2C**). This analysis revealed a significant main effect of Group ( $F_{(2,67)} = 3.94$ ,  $p = 0.024$ ,  
376 partial  $\eta^2 = 0.11$ ). Post-hoc comparisons revealed greater encoding reactivation in NE ( $p = 0.010$ ,  
377 95%CI = [0.011, 0.077]) and EE ( $p = 0.046$ , 95%CI = [0.000, 0.064]) groups than the NN group. This  
378 result indicates that emotional information generally increases trial-specific reactivation in the  
379 hippocampus not only for related neutral memory in the NE group, but also for the other emotional  
380 memory in the EE group during encoding.

381

382 Subsequently, to investigate different emotion-modulated effects on hippocampal retrieval reactivation,  
383 we conducted a 2 (Measure: retrieval-first reactivation vs. retrieval-second reactivation) by 3 (Group:  
384 NN vs. NE vs. EE) repeated-measures ANOVA. This analysis revealed a significant Measure-by-Group  
385 interaction effect ( $F_{(2,65)} = 3.42$ ,  $p = 0.039$ , partial  $\eta^2 = 0.10$ ; *Fig. S4*). Post-hoc comparisons revealed  
386 both greater retrieval-first reactivation ( $p = 0.019$ , 95%CI = [0.003, 0.027]) and retrieval-second  
387 reactivation ( $p = 0.033$ , 95%CI = [0.001, 0.026]) in the NE group than the NN group. However, it only  
388 revealed greater retrieval-second reactivation ( $p = 0.008$ , 95%CI = [0.005, 0.029]), but not retrieval-first  
389 reactivation ( $p = 0.39$ ), in the EE group than the NN group. Furthermore, although only first  
390 associations were instructed for retrieval during the category recall test, the retrieval-second  
391 reactivation was significantly stronger than retrieval-first reactivation in the EE group ( $t_{(21)} = 2.91$ ,  $p =$   
392 0.008, Cohen's  $d = 0.62$ ), but not in NN ( $t_{(24)} = -0.22$ ,  $p = 0.828$ ) and NE ( $t_{(20)} = -0.72$ ,  $p = 0.483$ ) groups.  
393 These results suggest that the hippocampal reactivations of first and second associations during  
394 retrieval might facilitate each other in the NE group, but interfere with each other in the EE group. To  
395 directly investigate this special interference effect between the retrieval of first and second associations  
396 in the EE group, we measured retrieval reactivation interference as a difference between retrieval-  
397 second and retrieval-first reactivation (i.e., retrieval-second minus retrieval-first reactivation). One-way  
398 ANOVA revealed a significant main effect of Group ( $F_{(2,65)} = 3.43$ ,  $p = 0.039$ , partial  $\eta^2 = 0.10$ ) (**Fig. 2D**).



399 Post-hoc comparisons revealed greater retrieval reactivation interference in the EE group than NN ( $p =$   
400 0.032, 95%CI = [0.001, 0.022]) and NE ( $p = 0.022$ , 95%CI = [0.002, 0.024]) groups. This result further  
401 indicates that emotional information impairs trial-specific reactivation in the hippocampus for other  
402 related emotional memory in the EE group during retrieval.

403

404 To examine the hippocampal regional specificity for above observed effects, we conducted parallel  
405 control analyses for the posterior medial cortex (PMC). The PMC is known as a critical region engaged  
406 in retrieval-mediated reinstatement of initial encoding patterns (Chen et al., 2017; Jonker et al., 2018;  
407 Ranganath and Ritchey, 2012). However, these PMC analyses revealed no reliable effect for either  
408 encoding reactivation ( $F_{(2,67)} = 0.69$ ,  $p = 0.503$ ) or retrieval reactivation interference ( $F_{(2,65)} = 1.13$ ,  $p =$   
409 0.330; *Fig. S5*).

410

411 Altogether, these reactivation results demonstrate that the emotion-related facilitation effect is  
412 associated with increased hippocampal reactivation during both encoding and retrieval. However, the  
413 emotion-related interference effect is associated with a potential trade-off between impaired  
414 hippocampal reactivation during retrieval and increased hippocampal reactivation during encoding.  
415 Both effects are selectively linked to hippocampal-mediated memory integration mechanisms, but not  
416 other regions involved in reactivation (or reinstatement), such as the PMC.

417

418 **Functional connectivity: The emotion-related facilitation and interference effects are associated**  
419 **with different strength levels of hippocampal connectivity during encoding.**

420 To further investigate whether and how hippocampal functional connectivity contributes to the emotion-  
421 related facilitation and interference effects, we conducted a task-dependent gPPI analysis with the  
422 hippocampal ROI as a seed (**Fig. 3A**). We focused on the processes of successful memory integration.  
423 Therefore, the hippocampal connectivity analysis was conducted only for the triplets with both

424 associations remembered during the encoding of second associations relative to first associations. We  
425 extracted hippocampal connectivity data from the anatomically defined amygdala ROI (**Fig. 3B**) and  
426 then submitted the data into a one-way ANOVA. This analysis revealed a significant main effect of  
427 Group ( $F_{(2,58)} = 4.04$ ,  $p = 0.023$ , partial  $\eta^2 = 0.12$ ; **Fig. 3D**). Post-hoc comparisons revealed greater  
428 hippocampal-amygdala connectivity in the NE group than NN ( $p = 0.021$ , 95%CI = [0.085, 1.006]) and  
429 EE ( $p = 0.013$ , 95%CI = [0.125, 1.035]) groups. Beyond the hippocampal-amygdala connectivity  
430 analysis, the whole-brain hippocampal connectivity analysis revealed significant main effects of Group  
431 in the right temporoparietal junction (TPJ), bilateral supplementary motor area (SMA), bilateral middle  
432 cingulate cortex (MCC) and left precuneus (**Fig. 3C**; *Table S1*). Post-hoc comparisons revealed  
433 significantly greater hippocampal functional coupling with these regions in the NE group than NN (TPJ:  
434  $p < 0.001$ , 95%CI = [0.962, 2.401]; SMA:  $p < 0.001$ , 95%CI = [0.944, 2.308]; MCC:  $p < 0.001$ , 95%CI =  
435 [0.966, 2.139]; precuneus:  $p < 0.001$ , 95%CI = [1.076, 2.367]; **Fig. 3E**). It also revealed greater  
436 hippocampal coupling in the EE group than the NN group (SMA:  $p = 0.023$ , 95%CI = [0.111, 1.459];  
437 MCC:  $p = 0.059$ , 95%CI = [-0.021, 1.138]; precuneus:  $p = 0.012$ , 95%CI = [0.193, 1.469]), whereas  
438 weaker than the NE group (TPJ:  $p = 0.001$ , 95%CI = [-1.948, -0.526]; SMA:  $p = 0.015$ , 95%CI = [-1.515,  
439 -0.167]; MCC:  $p = 0.001$ , 95%CI = [-1.574, -0.415]; precuneus:  $p = 0.007$ , 95%CI = [-1.528, -0.253]; **Fig.**  
440 **3E**). These results indicate that emotional information generally enhances hippocampal coupling with  
441 the amygdala, TPJ, SMA, MCC, and precuneus supporting successful integrative encoding in the NE  
442 and EE groups, compared to the NN group. However, the emotional enhancement effect for  
443 hippocampal coupling in the EE group is weaker than it in the NE group. Additionally, no main effect of  
444 Group was found in the hippocampal connectivity analysis during retrieval (*Fig. S6*).

445  
446 Together, these connectivity results demonstrate that the emotion-related facilitation effect is  
447 associated with strengthened hippocampal connectivity, but the interference effect is associated with  
448 relatively weak hippocampal connectivity during online integration.

449

## 450 **Discussion**

451 In this study, we examined distinct neural mechanisms of different emotional modulations on memory  
452 integration. Specifically, we found that emotional information facilitated memory integration with related  
453 neutral information, but disrupted the integration with other emotional information. Emotion-facilitated  
454 memory integration of neutral and emotional information was associated with increased hippocampal  
455 reactivation during both encoding and retrieval. This facilitated integration was also associated with  
456 strengthened hippocampal connectivity with the amygdala, TPJ, SMA, MCC, and precuneus during  
457 integrative encoding. Emotion-interfered memory integration of two emotional pieces of information was  
458 associated with impaired hippocampal reactivation during retrieval, which seemed to offset the  
459 facilitating effect of increased hippocampal reactivation during encoding. This disrupted integration was  
460 associated with relatively weak hippocampal coupling with the SMA, MCC, and precuneus during  
461 integrative encoding. Our findings identify the emotion-induced facilitation and interference effects  
462 occurring on two types of emotional memory integration, through distinct dynamical hippocampal  
463 processes of trial-specific reactivation and connectivity.

464

### 465 **Emotion-facilitated memory integration**

466 We provided compelling evidence for an emotion-induced facilitation effect on memory integration with  
467 neutral information. Behaviorally, the facilitation effect only occurred on the integrated memory in the  
468 immediate test. This result suggests a rapid and trial-specific facilitation for integrating related neutral  
469 and emotional memories, supporting the view of “associative facilitation” (Kuhl et al., 2010; Schlichting  
470 and Preston, 2014; Wimmer and Shohamy, 2012). It is also in line with previous studies, showing that  
471 linking a neutral mundane event to emotionally salient information can enhance memory for the neutral  
472 event due to its gained value and significance for the future (Holmes et al., 2022; Li et al., 2008; Sharpe  
473 et al., 2017; Zhu et al., 2022). However, we did not find any facilitation effect on non-integrated  
474 memories, which differs from the delayed and generalized emotional enhancement for weak memories

475 encoded closely in time, as proposed in synaptic tagging-and-capture models (Ballarini et al., 2009;  
476 Dunsmoor et al., 2015; Frey and Morris, 1997). Thus, the observed emotion-facilitated effect appears to  
477 be specific for episode-unique integration, which maintains our emotional generalization to target  
478 events and avoids maladaptive overgeneralization resulting in affective disorders, such as phobia and  
479 posttraumatic stress disorder (PTSD) (Lange et al., 2019; Mary et al., 2020; Sripada et al., 2012).

480

481 In support of the emotion-facilitated integration, our imaging results showed that emotional information  
482 increased hippocampal reactivation of related memories during both encoding and retrieval. Consistent  
483 with emerging work using MVPA to study human episodic memory (Heinen et al., 2023; Hennings et al.,  
484 2022; Staresina et al., 2012; Xue et al., 2010), our findings of emotionally-charged increases in  
485 reactivation reflect trial-specific reinstatement (i.e., pair-specific similarity) controlling for a general  
486 category-level representation (i.e., across-pair similarity). Given the benefits of hippocampal pattern  
487 completion on integrative encoding (Kuhl et al., 2010; Shohamy and Wagner, 2008; Wong et al., 2019),  
488 the increased hippocampal reactivation of first neutral memories during encoding of second emotional  
489 associations could facilitate online integration by rapidly linking neural representations of related  
490 information. In addition, we found that the increased hippocampal reactivation of neutral memories  
491 during retrieval was accompanied by increased reactivation of non-targeted emotional memories. By  
492 the view of retrieval-induced facilitation among related memories (Anderson and McCulloch, 1999;  
493 Bäuml and Schlichting, 2014; Chan et al., 2006; Rowland and DeLosh, 2014; Wallner and Bäuml,  
494 2017), the simultaneous reactivations of integrated neutral and emotional memories during retrieval  
495 could benefit each other, strengthen their connections and further facilitate their integration. Together,  
496 our findings demonstrate a dynamic emotion-facilitated integration mechanism, whereby emotional  
497 information firstly promotes the formation of integration during encoding and further strengthens this  
498 integration during retrieval, by increasing hippocampal reactivation of related neutral memories in both  
499 phases.

500

501 Moreover, we found strengthened hippocampal coupling with the amygdala, TPJ, SMA, MCC, and  
502 precuneus during encoding, contributing to this emotion-facilitated memory integration. The amygdala,  
503 with arousal-induced noradrenergic activation, is well recognized to play an essential role in emotional  
504 learning and benefit hippocampal-dependent memory. The SMA and MCC are also thought to regulate  
505 emotion generalization to target events along integrated memory traces but not to other irrelevant  
506 events (Kohn et al., 2014; Wager et al., 2008). The emotional involvement in memory processes  
507 promotes information transmission and communication between the hippocampus and neocortex  
508 (Battaglia et al., 2011; Hermans et al., 2014; Hofstetter et al., 2012; Zhu et al., 2022). Indeed, we found  
509 strengthened hippocampal connectivity with the TPJ and precuneus, which are core regions of the  
510 default mode network (DMN) (Hyatt et al., 2015; Schacter and Addis, 2007; Schacter et al., 2011).  
511 Recent studies have shown that the DMN is reliably engaged in ‘online’ processing (i.e., encoding),  
512 updating prior beliefs in light of new knowledge to simulate possible future (Yeshurun et al., 2021;  
513 Zadbood et al., 2022). Together, these findings reveal that the emotion-facilitated memory integration is  
514 linked to a hippocampal hub neural circuit. Specifically, emotional information might strengthen  
515 hippocampal-DMN interactions through enhanced hippocampal-amygdala/SMA/MCC coupling, which  
516 thereafter promote hippocampal-mediated reactivation and the integration of episodic memories.

517

### 518 **Emotion-interfered memory integration**

519 While emotional information acts like a flashlight illuminating nearby representations, multiple emotional  
520 information can be dazzling and make it challenging to distinguish between these representations. We  
521 found evidence for an emotion-induced interference effect on memory integration with other emotional  
522 information. This interference effect is also selective for integrated memories, indicating its specificity  
523 for episode-unique integration. Additionally, we found that this interference effect might be due to a  
524 competitive relationship between two emotional memories. This result supports the “interference  
525 theory”, proposing that two salient emotional pieces of information interfere with each other because of

526 their equal dominance in attention and memory (Itti and Koch, 2000; Mather, 2007, 2009). The mutual  
527 inhibition between related emotional information would lead to an overall suppression of their  
528 integration (Mather and Sutherland, 2011; Mitchell et al., 2006). This emotion-interfered integration is  
529 also adaptive, because it may protect our memory system from conflicts across various emotional  
530 information and intrusive traumatic recollections (Brewin, 2006; Wimber et al., 2008). It thereby relieves  
531 emotional overload and dysregulation with vulnerability to affective disorders, such as anxiety,  
532 depression, phobias, and PTSD (Papageorgiou et al., 2000; Wells et al., 2004; Wells et al., 1997).

533

534 Consistent with emotion-facilitated integration, we found increased hippocampal reactivation of first  
535 emotional memories during the encoding of second emotional associations in the emotion-interfered  
536 integration. Besides reactivation, we also found strengthened hippocampal connectivity with the SMA,  
537 MCC, and precuneus supporting successful integrative encoding. This pattern of results suggests that  
538 online processing is generally promoted in the both facilitated and interfered integrations with new  
539 emotional learning. It is worth noting that the promoting effect seems to be weaker in emotion-interfered  
540 integration, considering its relatively weak statistical effect of reactivation and hippocampal-neocortical  
541 interactions compared with the emotion-facilitated integration.

542

543 More importantly, our observed emotion-interfered integration was mainly contributed by impaired  
544 hippocampal reactivation during retrieval, due to the competitive retrieval of two related emotional  
545 memories. We found a significantly increased hippocampal reactivation of non-target second emotional  
546 associations when first emotional associations were retrieved. The retrieval reactivation of non-target  
547 memories was even stronger than target ones, indicating an involuntary intrusive effect of recent  
548 emotional stimuli (Gagnepain et al., 2017; Herz et al., 2020; Mary et al., 2020). The view of mutually  
549 inhibitory control mechanisms is proposed to solve the conflict between two equally prioritized  
550 emotional pieces of information, by overall suppressing emotional benefits on hippocampal reactivation  
551 and weakening connections between related emotional memories (Brewin, 2006; Mather and

552 Sutherland, 2011; Wimber et al., 2015). Furthermore, the interference effect of impaired retrieval  
553 reactivation potentially offsets the facilitating effect of increased encoding reactivation, ending up with a  
554 disrupted integration. Together, our findings demonstrate a dynamic emotion-interfered integration  
555 mechanism, whereby the emotional memory integration formed and promoted during encoding is later  
556 disrupted by impaired hippocampal reactivation of related emotional memories during retrieval.

557

## 558 **Conclusion**

559 Our study specifies the emotion-induced facilitation and interference effects on two typical types of  
560 emotional memory integration, involving distinct dynamical processes of hippocampal trial-specific  
561 reactivation and connectivity. The emotion-facilitated memory integration of neutral and emotional  
562 information, is formed with increased hippocampal reactivation and connectivity during encoding, and  
563 further facilitated with mutually beneficial hippocampal reactivation of both information during retrieval.  
564 The emotion-interfered memory integration of two emotional pieces of information, is also formed with  
565 increased hippocampal reactivation and relatively weakly strengthened hippocampal connectivity during  
566 encoding, but later suffers more interference due to mutually impaired hippocampal reactivation during  
567 retrieval. Our findings provide a comprehensive explanation, with respect to the valences of related  
568 information, for previously divergent studies of emotional modulation on memory integration. These  
569 findings advance our understanding of neurobiological mechanisms by which emotions can differently  
570 modulate memory integration to foster adaptation to the future, and also provide novel insights into  
571 emotion dysregulation and maladaptive generalization in mental disorders.

572

## 573 **Declaration of competing interest**

574 The authors declare no competing interests.

575

576 **CRedit author statement**

577 **Yannan Zhu:** Conceptualization, Formal analysis, Data curation, Writing - original draft, Writing –  
578 review & editing, Visualization, Project administration, Funding acquisition; **Wei Liu:** Conceptualization,  
579 Formal analysis, Investigation, Data curation, Writing – review & editing, Project administration,  
580 Funding acquisition; **Nils Kohn:** Conceptualization, Data curation, Writing – review & editing,  
581 Supervision; **Guillén Fernández:** Conceptualization, Data curation, Writing – review & editing,  
582 Supervision, Project administration, Funding acquisition.

583

584 **Acknowledgments**

585 This work was supported by the Open Research Fund of the State Key Laboratory of Cognitive  
586 Neuroscience and Learning (CNLYB2103, W.L.), the Open Research Fund of the Key Laboratory of  
587 Adolescent Cyber Psychology and Behavior (CCNUCYPSYLAB2022B10, W.L.), the Major Program of  
588 the National Social Science Foundation of China (22&ZD187, W.L.), and the Ph.D. fellowship of the  
589 Chinese Scholarship Council (201806040186, Y.Z.). We thank Nancy Peeters for the assistance of  
590 data acquisition, Merel Koning and Bas Meuter for the memory performance evaluation.

591

592 **References**

- 593 Altman D G (1990) **Practical statistics for medical research:** CRC press.  
594 Anderson M C, McCulloch K C (1999) **Integration as a general boundary condition on retrieval-induced**  
595 **forgetting** *Journal of Experimental Psychology: Learning, Memory, Cognition* **25**: 608.  
596 Ballarini F, Moncada D, Martinez M C, Alen N, Viola H (2009) **Behavioral tagging is a general mechanism of long-**  
597 **term memory formation** *Proceedings of the National Academy of Sciences* **106**: 14599-14604.  
598 Bartlett F C (1932) **Remembering: A study in experimental and social psychology:** Cambridge university press.  
599 Battaglia F P, Benchenane K, Sirota A, Pennartz C M, Wiener S I (2011) **The hippocampus: hub of brain network**  
600 **communication for memory** *Trends Cogn Sci* **15**: 310-318.  
601 Bäuml K-H T, Schlichting A (2014) **Memory retrieval as a self-propagating process** *Cognition* **132**: 16-21.  
602 Bäuml K H, Samenieh A (2010) **The two faces of memory retrieval** *Psychol Sci* **21**: 793-795.



- 603 Biderman N, Bakkour A, Shohamy D (2020) **What Are Memories For? The Hippocampus Bridges Past**  
604 **Experience with Future Decisions** *Trends Cogn Sci* **24**: 542-556.
- 605 Bravo-Rivera C, Sotres-Bayon F (2020) **From Isolated Emotional Memories to Their Competition During Conflict**  
606 *Front Behav Neurosci* **14**: 36.
- 607 Brewin C R (2006) **Understanding cognitive behaviour therapy: A retrieval competition account** *Behav Res Ther*  
608 **44**: 765-784.
- 609 Bunsey M, Eichenbaum H (1996) **Conservation of hippocampal memory function in rats and humans** *Nature*  
610 **379**: 255-257.
- 611 Carneiro P, Lapa A, Finn B (2021) **Memory updating after retrieval: when new information is false or correct**  
612 *Memory* **29**: 1156-1175.
- 613 Chan J C, McDermott K B, Roediger III H L (2006) **Retrieval-induced facilitation: initially nontested material can**  
614 **benefit from prior testing of related material** *Journal of Experimental Psychology: General* **135**: 553.
- 615 Chen J, Honey C J, Simony E, Arcaro M J, Norman K A, Hasson U (2016) **Accessing Real-Life Episodic Information**  
616 **from Minutes versus Hours Earlier Modulates Hippocampal and High-Order Cortical Dynamics** *Cereb*  
617 *Cortex* **26**: 3428-3441.
- 618 Chen J, Leong Y C, Honey C J, Yong C H, Norman K A, Hasson U (2017) **Shared memories reveal shared structure**  
619 **in neural activity across individuals** *Nat Neurosci* **20**: 115-125.
- 620 de Sousa A F, Chowdhury A, Silva A J (2021) **Dimensions and mechanisms of memory organization** *Neuron* **109**:  
621 2649-2662.
- 622 Dunsmoor J E, Murty V P, Davachi L, Phelps E A (2015) **Emotional learning selectively and retroactively**  
623 **strengthens memories for related events** *Nature* **520**: 345-348.
- 624 Ebbinghaus H (1885) **Über das gedächtnis: untersuchungen zur experimentellen psychologie**: Duncker &  
625 Humblot.
- 626 Eichenbaum H (2000) **A cortical–hippocampal system for declarative memory** *Nature Reviews Neuroscience* **1**:  
627 41-50.
- 628 Esteban O, Markiewicz C J, Blair R W, Moodie C A, Isik A I, Erramuzpe A, . . . Snyder M (2019) **fMRIPrep: a robust**  
629 **preprocessing pipeline for functional MRI** *Nature methods* **16**: 111-116.
- 630 Frey U, Morris R G (1997) **Synaptic tagging and long-term potentiation** *Nature* **385**: 533-536.
- 631 Friston K, Buechel C, Fink G, Morris J, Rolls E, Dolan R (1997) **Psychophysiological and modulatory interactions**  
632 **in neuroimaging** *Neuroimage* **6**: 218-229.
- 633 Gagnepain P, Hulbert J, Anderson M C (2017) **Parallel Regulation of Memory and Emotion Supports the**  
634 **Suppression of Intrusive Memories** *J Neurosci* **37**: 6423-6441.
- 635 Greve D N, Fischl B (2009) **Accurate and robust brain image alignment using boundary-based registration**  
636 *Neuroimage* **48**: 63-72.
- 637 Harrison T M, McLaren D G, Moody T D, Feusner J D, Bookheimer S Y (2017) **Generalized Psychophysiological**  
638 **Interaction (PPI) analysis of memory related connectivity in individuals at genetic risk for alzheimer's**  
639 **disease** *JoVE (Journal of Visualized Experiments)* e55394.
- 640 Heinen R, Bierbrauer A, Wolf O T, Axmacher N (2023) **Representational formats of human memory traces** *Brain*  
641 *Struct Funct*
- 642 Hennings A C, McClay M, Drew M R, Lewis-Peacock J A, Dunsmoor J E (2022) **Neural reinstatement reveals**  
643 **divided organization of fear and extinction memories in the human brain** *Curr Biol* **32**: 304-314 e305.
- 644 Hermans E J, Battaglia F P, Atsak P, de Voogd L D, Fernández G, Roozendaal B (2014) **How the amygdala affects**  
645 **emotional memory by altering brain network properties** *Neurobiology of learning and memory* **112**: 2-  
646 16.
- 647 Herz N, Bar-Haim Y, Holmes E A, Censor N (2020) **Intrusive memories: A mechanistic signature for emotional**  
648 **memory persistence** *Behav Res Ther* **135**: 103752.
- 649 Hofstetter C, Achabou A, Vuilleumier P (2012) **Reactivation of visual cortex during memory retrieval: content**  
650 **specificity and emotional modulation** *Neuroimage* **60**: 1734-1745.

- 651 Holmes N M, Wong F S, Bouchekioua Y, Westbrook R F (2022) **Not "either-or" but "which-when": A review of**  
652 **the evidence for integration in sensory preconditioning** *Neuroscience Biobehavioral Reviews* **132**: 1197-  
653 1204.
- 654 Hyatt C J, Calhoun V D, Pearlson G D, Assaf M (2015) **Specific default mode subnetworks support mentalizing as**  
655 **revealed through opposing network recruitment by social and semantic fMRI tasks** *Hum Brain Mapp*  
656 **36**: 3047-3063.
- 657 Itti L, Koch C (2000) **A saliency-based search mechanism for overt and covert shifts of visual attention** *Vision*  
658 *research* **40**: 1489-1506.
- 659 Jenkinson M, Bannister P, Brady M, Smith S (2002) **Improved optimization for the robust and accurate linear**  
660 **registration and motion correction of brain images** *Neuroimage* **17**: 825-841.
- 661 Jenkinson M, Beckmann C F, Behrens T E, Woolrich M W, Smith S M (2012) **Fsl** *Neuroimage* **62**: 782-790.
- 662 Jonker T R, Dimsdale-Zucker H, Ritchey M, Clarke A, Ranganath C (2018) **Neural reactivation in parietal cortex**  
663 **enhances memory for episodically linked information** *Proceedings of the National Academy of Sciences*  
664 **115**: 11084-11089.
- 665 Kohn N, Eickhoff S B, Scheller M, Laird A R, Fox P T, Habel U (2014) **Neural network of cognitive emotion**  
666 **regulation--an ALE meta-analysis and MACM analysis** *Neuroimage* **87**: 345-355.
- 667 Kriegeskorte N, Mur M, Bandettini P A J F i s n (2008) **Representational similarity analysis-connecting the**  
668 **branches of systems neuroscience** 4.
- 669 Kuhl B A, Shah A T, DuBrow S, Wagner A D (2010) **Resistance to forgetting associated with hippocampus-**  
670 **mediated reactivation during new learning** *Nat Neurosci* **13**: 501-506.
- 671 LaBar K S, Cabeza R (2006) **Cognitive neuroscience of emotional memory** *Nat Rev Neurosci* **7**: 54-64.
- 672 Lang P J, Bradley M M, Cuthbert B N (1997) **International affective picture system (IAPS): Technical manual and**  
673 **affective ratings** *NIMH Center for the Study of Emotion and Attention* **1**: 3.
- 674 Lange I, Goossens L, Bakker J, Michielse S, Marcelis M, Wichers M, . . . Schruers K (2019) **Functional**  
675 **neuroimaging of associative learning and generalization in specific phobia** *Progress in Neuro-*  
676 *Psychopharmacology and Biological Psychiatry* **89**: 275-285.
- 677 LeDoux J E (1994) **Emotion, memory and the brain** *Scientific American* **270**: 50-57.
- 678 Li W, Howard J D, Parrish T B, Gottfried J A (2008) **Aversive learning enhances perceptual and cortical**  
679 **discrimination of indiscriminable odor cues** *Science* **319**: 1842-1845.
- 680 Lima Portugal L C, Alves R C S, Junior O F, Sanchez T A, Mocaiber I, Volchan E, . . . Pereira M G (2020) **Interactions**  
681 **between emotion and action in the brain** *Neuroimage* **214**: 116728.
- 682 Liu W, Kohn N, Fernandez G (2020) **Probing the neural dynamics of mnemonic representations after the initial**  
683 **consolidation** *Neuroimage* **221**: 117213.
- 684 Liu W, Kohn N, Fernandez G (2021) **Dynamic Transitions between Neural States Are Associated with Flexible**  
685 **Task Switching during a Memory Task** *J Cogn Neurosci* **33**: 2559-2588.
- 686 Mary A, Dayan J, Leone G, Postel C, Fraise F, Malle C, . . . De la Sayette V (2020) **Resilience after trauma: The**  
687 **role of memory suppression** *Science* **367**: eaay8477.
- 688 Mather M (2007) **Emotional arousal and memory binding: An object-based framework** *Perspectives on*  
689 *Psychological Science* **2**: 33-52.
- 690 Mather M. (2009). Chapter 3 When Emotion Intensifies Memory Interference. In *The Psychology of Learning and*  
691 *Motivation* (pp. 101-120).
- 692 Mather M, Sutherland M R (2011) **Arousal-Biased Competition in Perception and Memory** *Perspect Psychol Sci*  
693 **6**: 114-133.
- 694 McClelland J L, McNaughton B L, O'Reilly R C J P r (1995) **Why there are complementary learning systems in the**  
695 **hippocampus and neocortex: insights from the successes and failures of connectionist models of**  
696 **learning and memory** **102**: 419.
- 697 Mitchell K J, Mather M, Johnson M K, Raye C L, Greene E J (2006) **A functional magnetic resonance imaging**  
698 **investigation of short-term source and item memory for negative pictures** *NeuroReport* **17**: 1543-1547.

- 699 Morelli F, Burton P A (2009) **The impact of induced stress upon selective attention in multiple object tracking**  
700 *Military Psychology* **21**: 81-97.
- 701 Nader K, Schafe G E, Le Doux J E (2000) **Fear memories require protein synthesis in the amygdala for**  
702 **reconsolidation after retrieval** *Nature* **406**: 722-726.
- 703 Nyberg L, Habib R, McIntosh A R, Tulving E (2000) **Reactivation of encoding-related brain activity during**  
704 **memory retrieval** *Proceedings of the National Academy of Sciences* **97**: 11120-11124.
- 705 Papageorgiou C, Wells A J C, Practice B (2000) **Treatment of recurrent major depression with attention training**  
706 **7**: 407-413.
- 707 Piaget J (2002) **Judgement and reasoning in the child**: Routledge.
- 708 Preston A R, Shrager Y, Dudukovic N M, Gabrieli J D (2004) **Hippocampal contribution to the novel use of**  
709 **relational information in declarative memory** *Hippocampus* **14**: 148-152.
- 710 Pruim R H, Mennes M, van Rooij D, Llera A, Buitelaar J K, Beckmann C F (2015) **ICA-AROMA: A robust ICA-based**  
711 **strategy for removing motion artifacts from fMRI data** *Neuroimage* **112**: 267-277.
- 712 Przybyslawski J, Sara S (1997) **Reconsolidation of memory after its reactivation** *Behavioural brain research* **84**:  
713 241-246.
- 714 Ranganath C, Ritchey M (2012) **Two cortical systems for memory-guided behaviour** *Nature Reviews*  
715 *Neuroscience* **13**: 713-726.
- 716 Remondes M, Wilson M A (2013) **Cingulate-hippocampus coherence and trajectory coding in a sequential**  
717 **choice task** *Neuron* **80**: 1277-1289.
- 718 Richter-Levin G, Akirav I (2000) **Amygdala-hippocampus dynamic interaction in relation to memory** *Molecular*  
719 *neurobiology* **22**: 11-20.
- 720 Roediger H L, Abel M (2022) **The double-edged sword of memory retrieval** *Nature Reviews Psychology* **1**: 708-  
721 720.
- 722 Rowland C A, DeLosh E L (2014) **Benefits of testing for nontested information: Retrieval-induced facilitation of**  
723 **episodically bound material** *Psychonomic bulletin & review* **21**: 1516-1523.
- 724 Schacter D L (1999) **The seven sins of memory: insights from psychology and cognitive neuroscience** *American*  
725 *psychologist* **54**: 182.
- 726 Schacter D L, Addis D R (2007) **The cognitive neuroscience of constructive memory: remembering the past and**  
727 **imagining the future** *Philosophical Transactions of the Royal Society B: Biological Sciences* **362**: 773-786.
- 728 Schacter D L, Guerin S A, St Jacques P L (2011) **Memory distortion: an adaptive perspective** *Trends Cogn Sci* **15**:  
729 467-474.
- 730 Schlichting M L, Frankland P W (2017) **Memory allocation and integration in rodents and humans** *Current*  
731 *Opinion in Behavioral Sciences* **17**: 90-98.
- 732 Schlichting M L, Guarino K F, Roome H E, Preston A R (2021) **Developmental differences in memory reactivation**  
733 **relate to encoding and inference in the human brain** *Nat Hum Behav*
- 734 Schlichting M L, Mumford J A, Preston A R (2015) **Learning-related representational changes reveal dissociable**  
735 **integration and separation signatures in the hippocampus and prefrontal cortex** *Nat Commun* **6**: 8151.
- 736 Schlichting M L, Preston A R (2014) **Memory reactivation during rest supports upcoming learning of related**  
737 **content** *Proc Natl Acad Sci U S A* **111**: 15845-15850.
- 738 Schlichting M L, Preston A R (2015) **Memory integration: neural mechanisms and implications for behavior** *Curr*  
739 *Opin Behav Sci* **1**: 1-8.
- 740 Schwabe L, Nader K, Pruessner J C (2014) **Reconsolidation of human memory: brain mechanisms and clinical**  
741 **relevance** *Biol Psychiatry* **76**: 274-280.
- 742 Sharpe M J, Batchelor H M, Schoenbaum G (2017) **Preconditioned cues have no value** *Elife* **6**: e28362.
- 743 Shepard R N (1987) **Toward a universal law of generalization for psychological science** *Science* **237**: 1317-1323.
- 744 Shirer W R, Ryali S, Rykhlevskaia E, Menon V, Greicius M D (2012) **Decoding subject-driven cognitive states with**  
745 **whole-brain connectivity patterns** *Cereb Cortex* **22**: 158-165.

- 746 Shohamy D, Daw N D (2015) **Integrating memories to guide decisions** *Current Opinion in Behavioral Sciences* **5**:  
747 85-90.
- 748 Shohamy D, Wagner A D (2008) **Integrating memories in the human brain: hippocampal-midbrain encoding of**  
749 **overlapping events** *Neuron* **60**: 378-389.
- 750 Sripada R K, King A P, Welsh R C, Garfinkel S N, Wang X, Sripada C S, Liberzon I (2012) **Neural dysregulation in**  
751 **posttraumatic stress disorder: evidence for disrupted equilibrium between salience and default mode**  
752 **brain networks** *Psychosom Med* **74**: 904-911.
- 753 Staresina B P, Henson R N, Kriegeskorte N, Alink A (2012) **Episodic reinstatement in the medial temporal lobe**  
754 *Journal of Neuroscience* **32**: 18150-18156.
- 755 Sutherland G R, McNaughton B (2000) **Memory trace reactivation in hippocampal and neocortical neuronal**  
756 **ensembles** *Current opinion in neurobiology* **10**: 180-186.
- 757 Tarder-Stoll H, Gasser C, Yu W, Dimsdale-Zucker H R (2021) **Challenges in Understanding the Role of**  
758 **Reactivation in Modifying Hippocampal Representations** *J Neurosci* **41**: 4750-4753.
- 759 Tayler K K, Tanaka K Z, Reijmers L G, Wiltgen B J (2013) **Reactivation of neural ensembles during the retrieval of**  
760 **recent and remote memory** *Curr Biol* **23**: 99-106.
- 761 Treves A, Rolls E T J H (1994) **Computational analysis of the role of the hippocampus in memory** **4**: 374-391.
- 762 Tulving E. (1983). Elements of episodic memory. Clarendon. In: Oxford.
- 763 Tulving E (1995) **Organization of memory: quo vadis?**
- 764 Tulving E, Thomson D M (1973) **Encoding specificity and retrieval processes in episodic memory** *Psychological*  
765 *review* **80**: 352.
- 766 van Kesteren M T, Brown T I, Wagner A D (2016) **Interactions between Memory and New Learning: Insights**  
767 **from fMRI Multivoxel Pattern Analysis** *Front Syst Neurosci* **10**: 46.
- 768 Wager T D, Davidson M L, Hughes B L, Lindquist M A, Ochsner K N (2008) **Prefrontal-subcortical pathways**  
769 **mediating successful emotion regulation** *Neuron* **59**: 1037-1050.
- 770 Wallner L, Bäuml K-H T (2017) **Beneficial effects of selective item repetition on the recall of other items** *Journal*  
771 *of Memory and Language* **95**: 159-172.
- 772 Wang F, Kahnt T (2021) **Neural circuits for inference-based decision-making** *Current Opinion in Behavioral*  
773 *Sciences* **41**: 10-14.
- 774 Wells A, Sembi S J C, Practice B (2004) **Metacognitive therapy for PTSD: A core treatment manual** **11**: 365-377.
- 775 Wells A, White J, Carter K J C P, Theory P A I J o, Practice (1997) **Attention training: Effects on anxiety and**  
776 **beliefs in panic and social phobia** **4**: 226-232.
- 777 Wimber M, Alink A, Charest I, Kriegeskorte N, Anderson M C (2015) **Retrieval induces adaptive forgetting of**  
778 **competing memories via cortical pattern suppression** *Nat Neurosci* **18**: 582-589.
- 779 Wimber M, Bauml K H, Bergstrom Z, Markopoulos G, Heinze H J, Richardson-Klavehn A (2008) **Neural markers of**  
780 **inhibition in human memory retrieval** *J Neurosci* **28**: 13419-13427.
- 781 Wimmer G E, Buchel C (2021) **Reactivation of Single-Episode Pain Patterns in the Hippocampus and Decision**  
782 **Making** *J Neurosci* **41**: 7894-7908.
- 783 Wimmer G E, Shohamy D (2012) **Preference by association: how memory mechanisms in the hippocampus bias**  
784 **decisions** *Science* **338**: 270-273.
- 785 Wong F S, Westbrook R F, Holmes N M (2019) **'Online' integration of sensory and fear memories in the rat**  
786 **medial temporal lobe** *Elife* **8**: e47085.
- 787 Woolrich M W, Ripley B D, Brady M, Smith S M J N (2001) **Temporal autocorrelation in univariate linear**  
788 **modeling of FMRI data** **14**: 1370-1386.
- 789 Xue G, Dong Q, Chen C, Lu Z, Mumford J A, Poldrack R A (2010) **Greater neural pattern similarity across**  
790 **repetitions is associated with better memory** *Science* **330**: 97-101.
- 791 Yeshurun Y, Nguyen M, Hasson U J N R N (2021) **The default mode network: where the idiosyncratic self meets**  
792 **the shared social world** **22**: 181-192.

- 793 Zadbood A, Nastase S, Chen J, Norman K A, Hasson U (2022) **Neural representations of naturalistic events are**  
794 **updated as our understanding of the past changes** *Elife* **11**: e79045.
- 795 Zeithamova D, Dominick A L, Preston A R (2012) **Hippocampal and ventral medial prefrontal activation during**  
796 **retrieval-mediated learning supports novel inference** *Neuron* **75**: 168-179.
- 797 Zeithamova D, Schlichting M L, Preston A R (2012) **The hippocampus and inferential reasoning: building**  
798 **memories to navigate future decisions** *Front Hum Neurosci* **6**: 70.
- 799 Zhu Y, Zeng Y, Ren J, Zhang L, Chen C, Fernández G, Qin S (2022) **Emotional learning retroactively promotes**  
800 **memory integration through rapid neural reactivation and reorganization** *Elife* **11**: e60190.

801

802

803

804

805

806

807

808

809

810

811

812

813

814

815

816

817

818

819

820

821

822

823

824 **Figure 1. Experimental design and cued-recall behavioral performance.**

825 **(A)** The experiment consisted of an encoding phase and an immediate retrieval phase including two memory  
826 tests. During the encoding phase, participants learned 48 first associations and then 48 overlapping second  
827 associations. During the retrieval phase, participants performed a category recall test only for the first  
828 associations and subsequently performed a cued-recall test for both the first and second associations. **(B)** Bar  
829 graphs depict average correct proportions for triplets with both associations remembered (i.e., integrated  
830 memory), and triplets with only one (either first or second) association remembered (i.e., non-integrated  
831 memory) in the three groups separately. **(C)** Bar graphs depict average proportions for triplets with only the first  
832 association remembered (i.e., only first associative memory), and triplets with only the second association  
833 remembered (i.e., only second associative memory) in the three groups separately. Error bars represent the  
834 standard error of the mean. Dots represent data from each participant. “X” indicates (marginally) significant  
835 interaction ( $p < 0.085$ ). Notes: \* $p < 0.05$ ; \*\* $p < 0.01$ ; two-tailed tests.  
836

837

838

839

840

841

842

843

844

845

846

847

848

849

850

851

852

853

854

855

856

857 **Figure 2. Hippocampal neural reactivation during encoding and retrieval.**

858 **(A)** Pattern similarity analysis approach. Several similarity measures were computed for each trial. **Encoding**  
859 **pair-specific similarity** (black) was computed by correlating each first association's multi-voxel activity pattern  
860 with its corresponding pattern of the second association during encoding. **Encoding across-pair similarity** (grey)  
861 was computed by averaging all correlations between each first association's pattern and the patterns of all other  
862 different second associations during encoding. **Retrieval-first pair-specific similarity** (yellow) was computed by  
863 correlating each location cue's pattern during retrieval with its corresponding pattern of the first association  
864 during encoding. **Retrieval-second pair-specific similarity** (green) was computed by correlating each location  
865 cue's pattern during retrieval with its corresponding pattern of the second association during encoding.  
866 **Retrieval across-pair similarity** (grey) was computed by averaging all correlations between each location cue's  
867 pattern during retrieval and the patterns of all other different associations (i.e., both first and second  
868 associations) during encoding. These correlations from each similarity measure were then averaged across trials  
869 for each participant. **(B)** The functionally defined bilateral hippocampal ROI was used in the pattern similarity  
870 analysis. **(C)** Bar graphs depict average encoding reactivation (i.e., encoding pair-specific vs. across-pair similarity)  
871 in the three groups separately. **(D)** Bar graphs depict average retrieval reactivation interference (i.e., retrieval-  
872 second vs. retrieval-first reactivation) in the three groups separately. Error bars represent the standard error of  
873 the mean. Dots represent data from each participant. Notes: \* $p < 0.05$ ; \*\* $p < 0.01$ ; two-tailed tests.  
874

875

876

877

878

879

880

881

882

883

884

885

886

887

888

889

890

891

892 **Figure 3. Hippocampal connectivity involved in successful memory integration during encoding.**

893 **(A)** The bilateral hippocampal seed was used in the task-dependent gPPI analysis. **(B)** The anatomically left  
894 amygdala ROI was used in this hippocampal connectivity analysis. **(C)** Significant clusters in the right  
895 temporoparietal junction (TPJ), bilateral supplementary motor area (SMA), bilateral middle cingulate cortex  
896 (MCC), and left precuneus, showing the main effect of Group. **(D-E)** Bar graphs depict average hippocampal  
897 connectivity with the amygdala, TPJ, SMA, MCC, and precuneus in the three groups separately. Error bars  
898 represent the standard error of the mean. Dots represent data from each participant. Notes: Color bar  
899 represents z values; a.u., arbitrary unit; L, left; R, right;  $\sim p < 0.08$ ;  $*p < 0.05$ ;  $**p < 0.01$ ;  $***p < 0.001$ ; two-tailed  
900 tests.  
901



(A)

Encoding Phase

Retrieval Phase

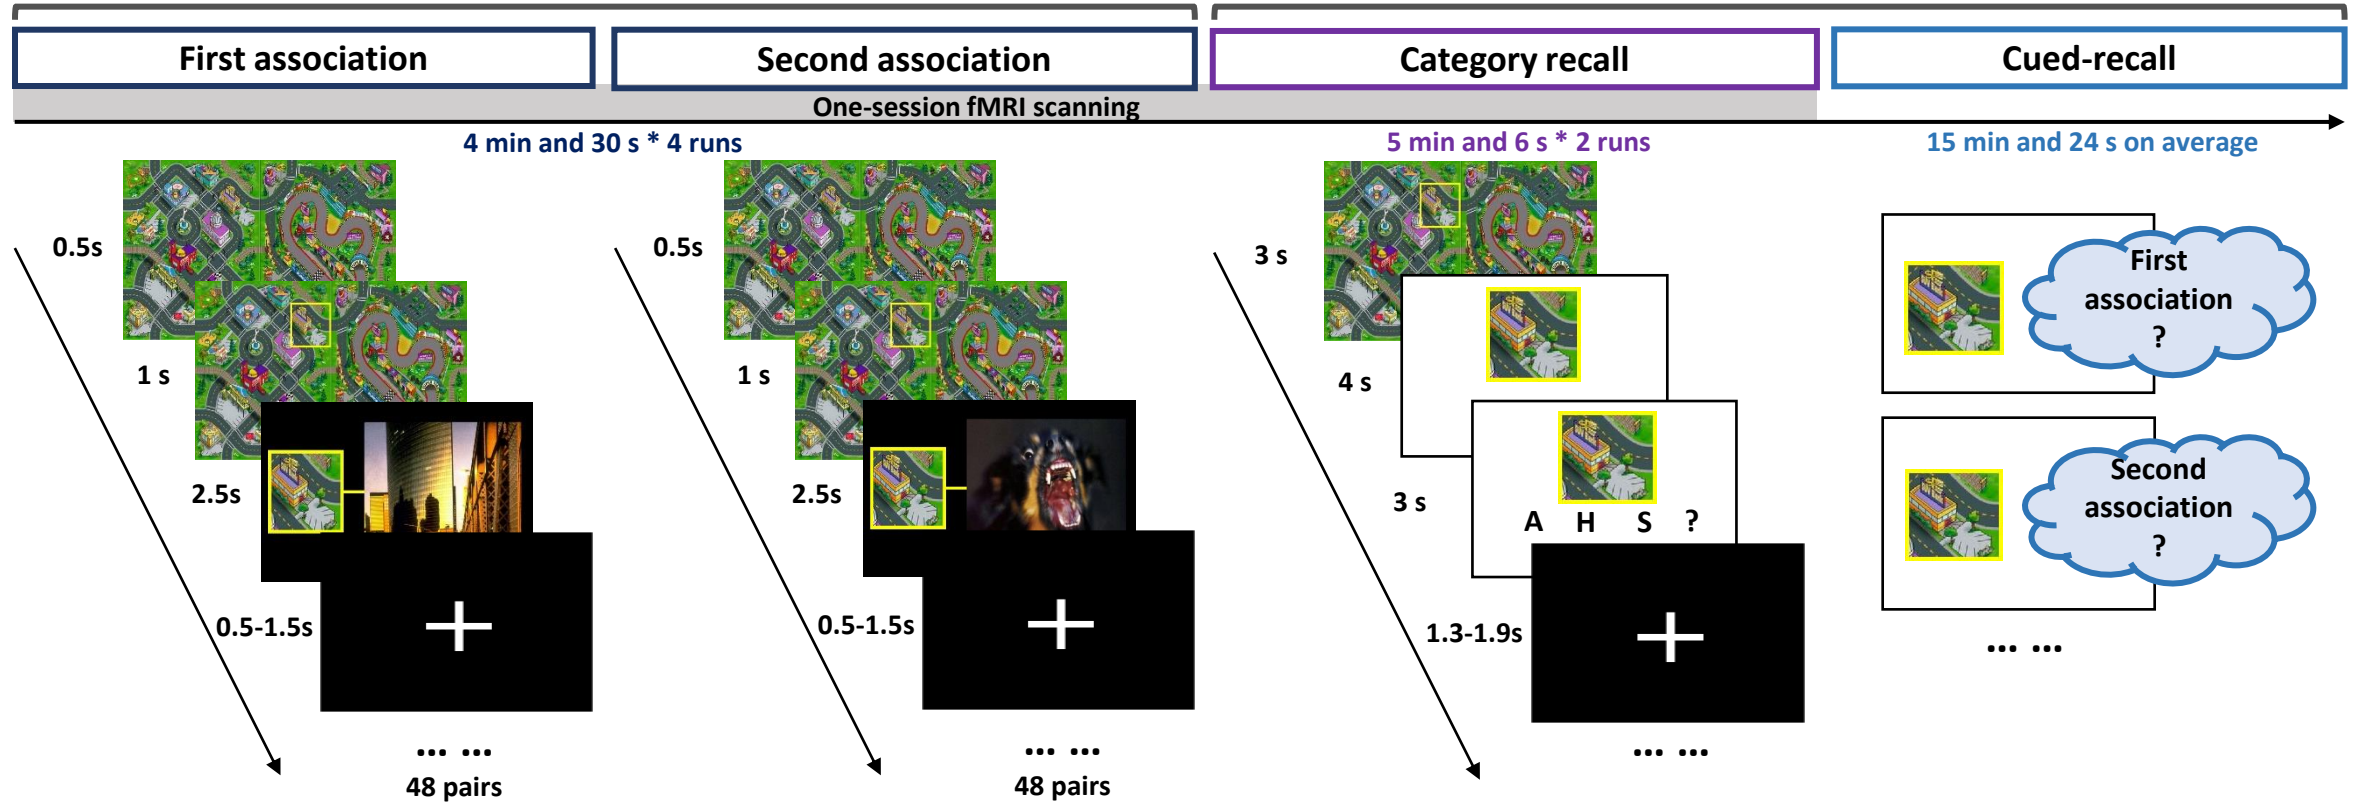

(B)

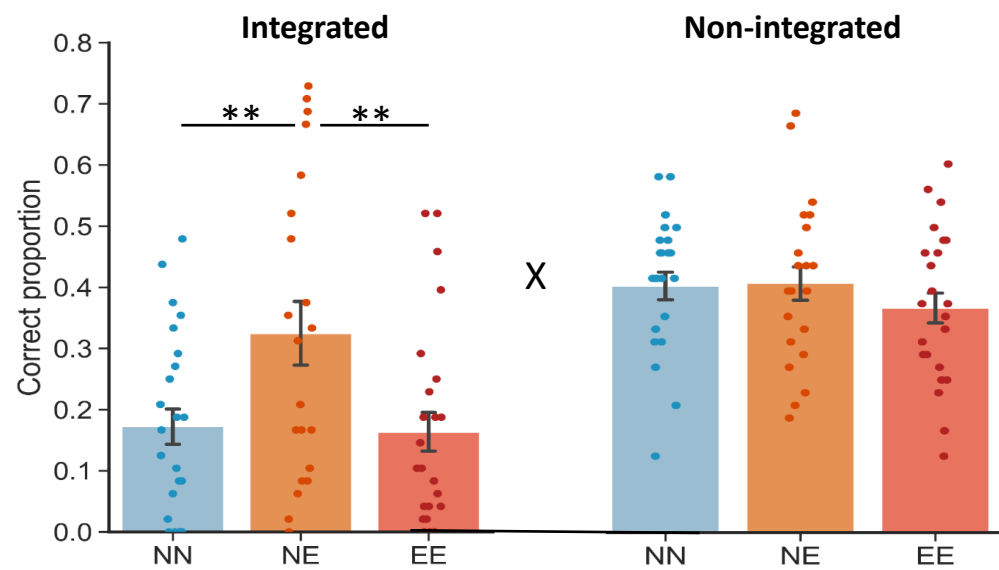

(C)

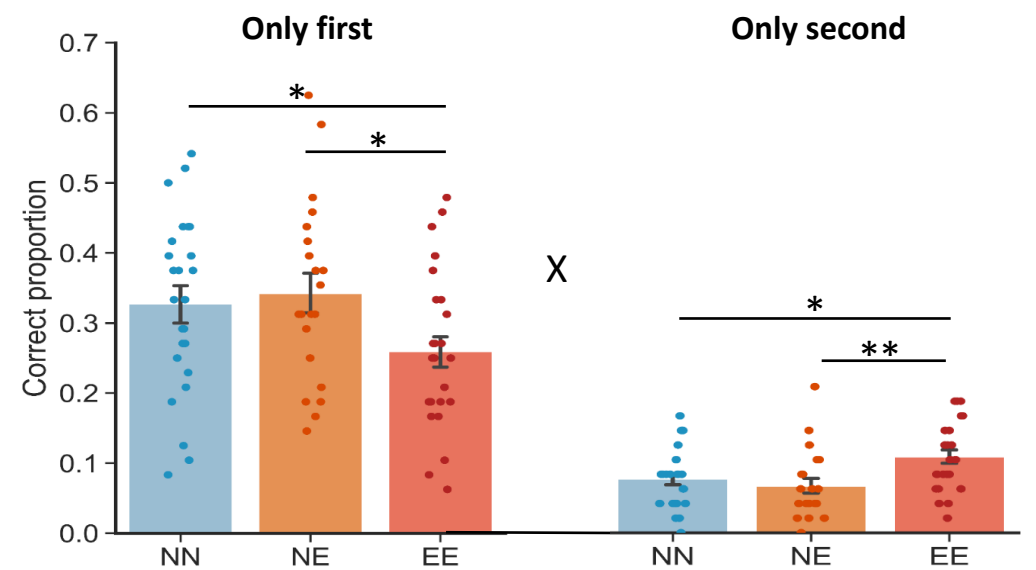

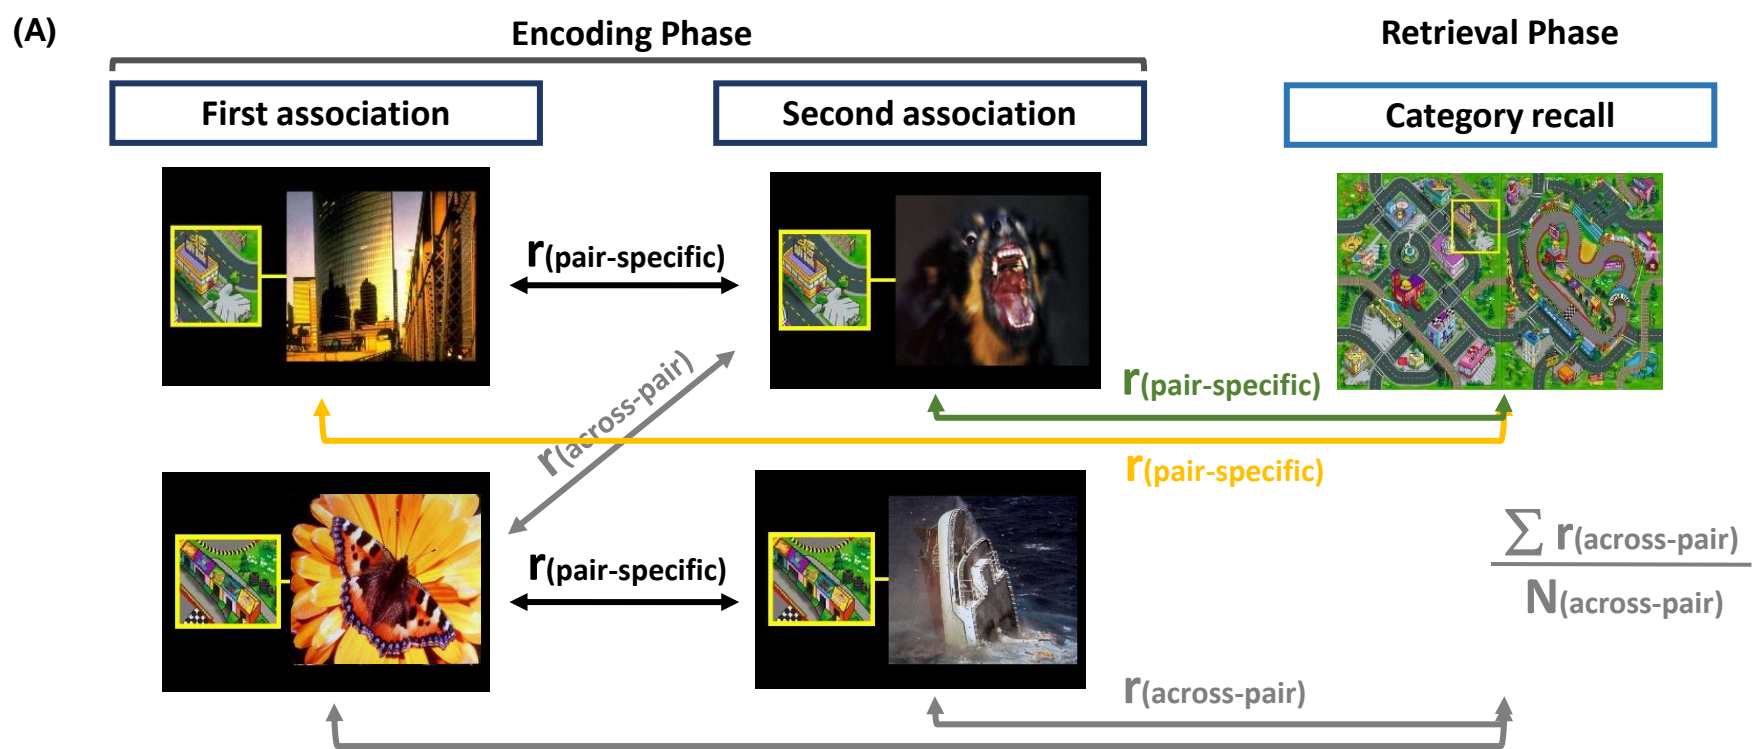

(B) **Hippocampal ROI**

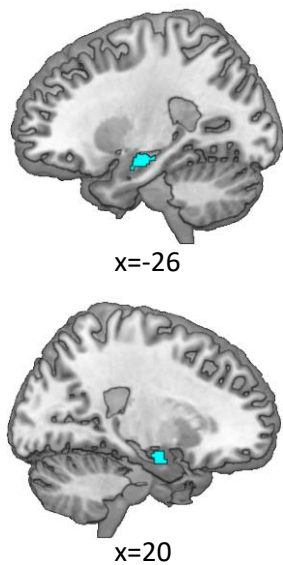

(C) **Encoding reactivation**

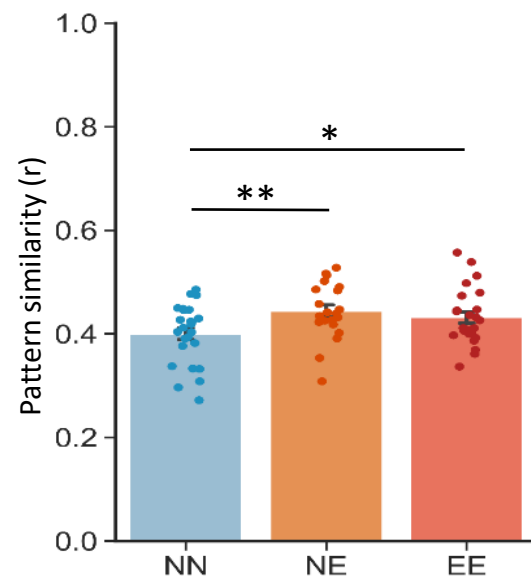

(D) **Retrieval reactivation interference (second vs. first)**

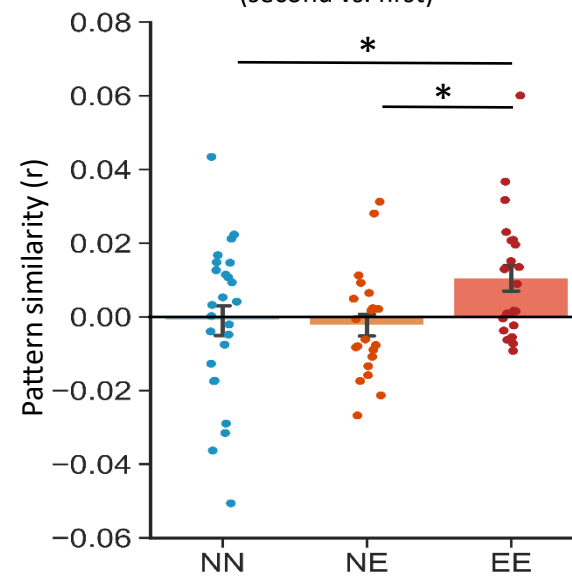

(A) Hippocampal seed

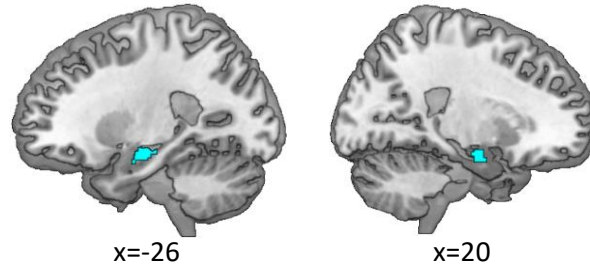

(B) Amygdala

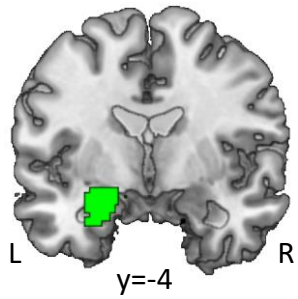

(C)

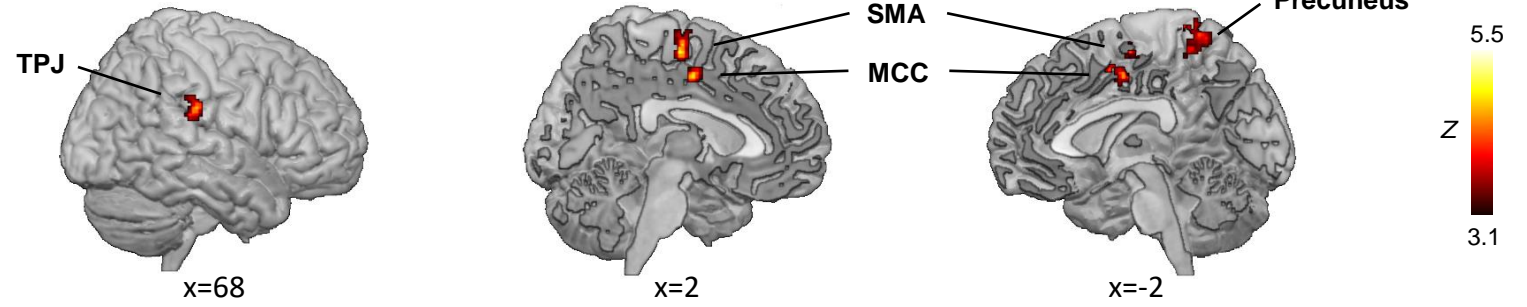

(D) Amygdala

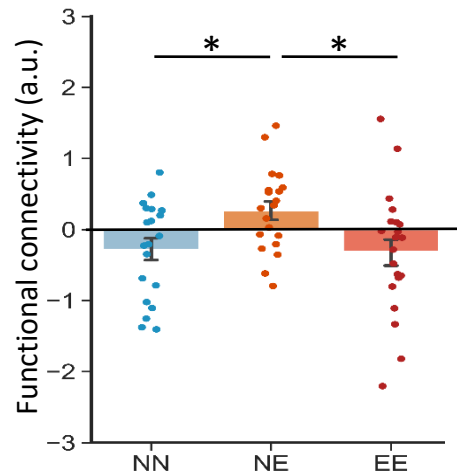

(E) TPJ

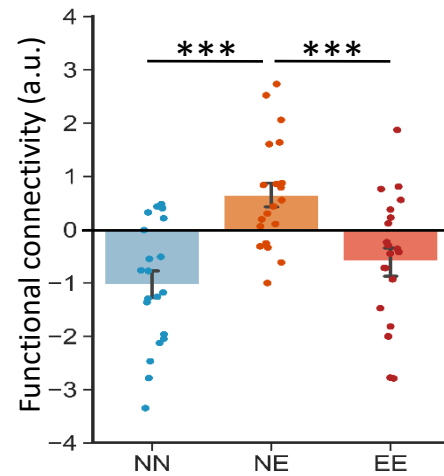

SMA

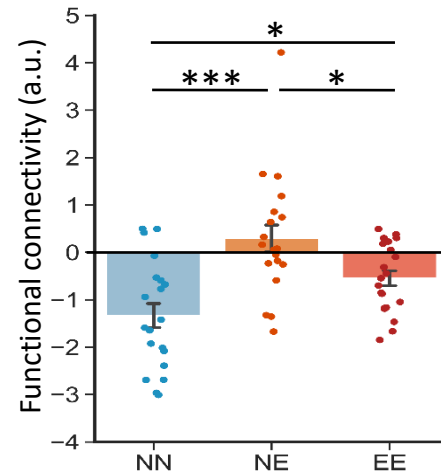

MCC

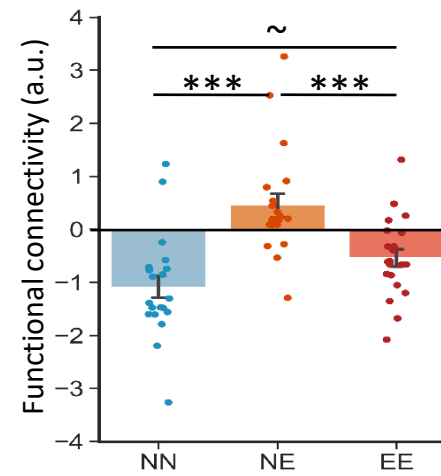

Precuneus

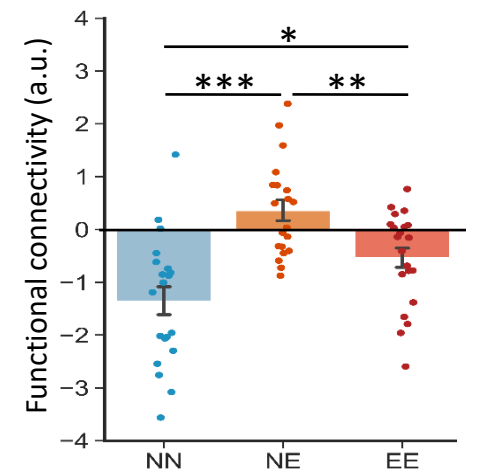

Source: https://www.biorxiv.org/content/biorxiv/early/2023/04/25/2023.04.25.538111.full.pdf
